# Supplementary material
Source: publisher site journal article supplement (https://static.cambridge.org/content/id/urn:cambridge.org:id:article:S2040174421000246/resource/name/S2040174421000246supp001.docx)
Supplement: Supplementary file 1 [file S2040174421000246supp001.docx]

**Supplementary material**

Table of Contents

**Supplementary Table S1.** Comparing cohort of current study with total cohort of UPBEAT 2

**Supplementary Table S2.** Linear regression coefficients for folate and ratios for vitamin B12 according to maternal characteristics 3
**Supplementary Table S3.** Complete list of adjusted regression coefficients for every CG4

**Supplementary Table S1.** Comparing cohort of current study with total cohort of UPBEAT

|  | All women in current study (n=951) | Women participating in UPBEAT that did not provide blood samples (n=603) | *p*† |
| --- | --- | --- | --- |
| Age (years) | 30.7 ± 5.5 | 30.1 ± 5.6 | 0.022 |
| BMI at first study visit (kg/m2) | 35.2 (32.8-38.8) | 34.9 (32.8-38.3) | 0.78‡ |
| Parity |  |  | 0.16 |
| Nulliparous | 426 (44.8%) | 248 (41.1%) |  |
| Multiparous | 525 (55.2%) | 355 (58.8%) |  |
| Ethnicity |  |  | <0.001 |
| White | 634 (66.7%) | 339 (56.2%) |  |
| Black | 203 (21.4%) | 198 (32.8%) |  |
| Asian | 66 (6.9%) | 29 (4.8%) |  |
| Other | 48 (5.1%) | 37 (6.1%) |  |
| Educational attainment |  |  | 0.017 |
| None, GCSE or vocational  qualification | 400 (42.1%) | 291 (48.3%) |  |
| A-level, first- or higher   degree | 551 (57.9%) | 312 (51.7%) |  |
| Index of multiple deprivation§ | |  | 0.034 |
| 1 (least deprived) | 50 (5.3%) | 15 (2.5%) |  |
| 2 | 70 (7.4%) | 33 (5.5%) |  |
| 3 | 109 (11.5%) | 68 (11.3%) |  |
| 4 | 325 (34.3%) | 208 (34.7%) |  |
| 5 (most deprived) | 394 (41.6%) | 276 (46%) |  |
| Smoking |  |  | 0.055 |
| Current | 65 (6.8%) | 43 (7.1%) |  |
| Ex-smoker | 233 (25.5%) | 180 (29.9%) |  |
| Never | 653 (68.7%) | 380 (63.0%) |  |
| Treatment allocation |  |  | 0.058 |
| Standard care | 490 (51.5%) | 281 (46.6%) |  |
| Intervention | 461 (48.5%) | 322 (53.4%) |  |

Data presented as mean ± standard deviation (SD) or median interquartile range (IQR) for continuous variables or number (%) for categorial variables. Abbreviations: UK pregnancies better eating and activity trial (UPBEAT), body mass index (BMI), general certificate of secondary education (GCSE); † Unpaired t-test for continuous data and Chi-square test for categorial data was used for comparing all women in the current study with women participating in UPBEAT that did not provide blood samples; ‡ Mann-Whitney U test; § n=948 for women in current study and n=600 for women participating in UPBEAT that did not provide blood samples.

**Supplementary Table S2.** Linear regression coefficients for folate and ratios for vitamin B12 according to maternal characteristics

|  | n | Serum folate Coefficient (95% CI) | *p* | Serum vitamin B12† Ratio (95% CI) | *p* |
| --- | --- | --- | --- | --- | --- |
| Age (years) |  |  |  |  |  |
| ≤24.9 | 131 | Reference | - |  |  |
| 25.0-34.9 | 559 | 2.48 (1.57, 3.38) ‡ | <0.001‡ | 1.08 (1.00, 1.18) ‡ | 0.058‡ |
| ≥35 | 261 | 3.77 (2.75, 4.79) ‡ | <0.001‡ | 1.12 (1.02, 1.23) ‡ | 0.014‡ |
| BMI at first study visit (kg/m2) | |  |  |  |  |
| 30-34.9 | 461 | Reference | - |  |  |
| 35-39.9 | 309 | -0.70 (-1.36, -0.04) ‡ | 0.037‡ | 0.93 (0.88, 0.99) ‡ | 0.021‡ |
| ≥40 | 181 | -0.64 (-1.43, 0.15) ‡ | 0.113‡ | 0.90 (0.84, 0.97) ‡ | 0.006‡ |
| Parity |  |  |  |  |  |
| Nulliparous | 426 | 2.45 (1.82, 3.08) ‡ | <0.001‡ | 0.98 (0.92, 1.03) | 0.40 |
| Multiparous | 525 | Reference | - |  |  |
| Ethnicity |  |  |  |  |  |
| White | 634 | Reference | - |  |  |
| Black | 203 | -0.64 (-1.42, 0.14) | 0.11 | 1.50 (1.40, 1.61) ‡ | <0.001‡ |
| Asian | 66 | 0.07 (-1.18, 1.32) | 0.91 | 0.95 (0.86, 1.06) | 0.39 |
| Other | 48 | 0.58 (-0.87, 2.03) | 0.43 | 1.14 (1.01, 1.29) ‡ | 0.035‡ |
| Educational attainment |  |  |  |  |  |
| None, GCSE or vocational  qualification | 400 | -0.99 (-1.61, -0.37) ‡ | 0.002‡ | 0.91 (0.86, 0.96) ‡ | 0.001‡ |
| A-level, first- or higher   degree | 551 | Reference | - |  |  |
| Index of multiple deprivation | |  |  |  |  |
| 1 (least deprived) | 50 | 0.55 (-0.82, 1.93) ‡ | 0.43‡ | 1.01 (0.88, 1.16) | 0.87 |
| 2 | 70 | 0.92 (-0.33, 2.17) | 0.15 | 0.99 (0.88, 1.12) | 0.90 |
| 3 | 109 | 0.94 (-0.10, 1.98) | 0.07 | 1.01 (0.92, 1.12) | 0.77 |
| 4 | 325 | 0.56 (-0.17, 1.28) | 0.13 | 1.05 (0.98, 1.12) | 0.18 |
| 5 (most deprived) | 394 | Reference | - |  |  |
| Smoking |  |  |  |  |  |
| Never | 653 | Reference | - |  |  |
| Ex-smoker | 233 | -0.34 (-1.07, 0.39) | 0.36 | 0.99 (0.93, 1.06) ‡ | 0.83 ‡ |
| Current | 65 | -2.31 (-3.51, -1.11) ‡ | <0.001‡ | 0.87 (0.78, 0.97) ‡ | 0.013‡ |
| Treatment allocation |  |  |  |  |  |
| Standard care | 490 | Reference | - |  |  |
| Intervention | 461 | 0.05 (-0.58, 0.67) | 0.89 | 0.99 (0.93, 1.05) | 0.64 |

CI, confidence interval; BMI, body mass index; GCSE, general certificate of secondary education. † data was logged for statistical analysis; ‡ adjusted for maternal age, ethnicity, parity, cigarette smoking, maternal BMI, education, level of deprivation and treatment allocation.

**Supplementary Table S3.** Complete list of adjusted regression coefficients for every Cytosine-Guanine (CG)

| CG | Folate | | Vitamin B12 | |
| --- | --- | --- | --- | --- |
|  | Estimated change in methylation | *p* value | Estimated change in methylation | *p* value |
| cg19736654 | -.0000296 | .869146 | .0008692 | .488356 |
| cg04322572 | -.0003562 | .5045547 | .0021885 | .5572258 |
| cg01783894 | .0004552 | .2489975 | .000104 | .9699323 |
| cg23948843 | -.0002295 | .4043204 | -.0028375 | .1395742 |
| cg15029631 | .0005872 | .2352845 | -.00248 | .4731121 |
| cg04632887 | .0001418 | .7279804 | .0020007 | .4822792 |
| cg19227924 | -5.23e-06 | .9801055 | .0022324 | .1268598 |
| cg13912311 | -.0005012 | .1804834 | -.0004888 | .8518 |
| cg04188920 | -.0004113 | .3893627 | -.0023116 | .4885389 |
| cg19497444 | -.0001408 | .8023066 | -.0019018 | .6282762 |
| cg02757970 | .0000342 | .9400346 | .0038138 | .2297024 |
| cg27565899 | .0005408 | .0194279 | .0019268 | .2341389 |
| cg20454518 | .0001202 | .7741959 | .0006027 | .8368791 |
| cg09357276 | .0001243 | .6757392 | -.0003613 | .8617904 |
| cg19592472 | .0000186 | .9699903 | .0033437 | .3319069 |
| cg15015340 | -.0001524 | .5558845 | .000569 | .7529499 |
| cg04347477 | .0015261 | .0122558 | -.0004902 | .9086003 |
| cg10573018 | -.0001956 | .3298699 | .0001924 | .8908834 |
| cg03336167 | -.0002127 | .3701715 | .0003912 | .8134984 |
| cg13874780 | -.0001456 | .6238373 | .0013162 | .5256042 |
| cg02001279 | .0007089 | .088228 | -.0036213 | .2127461 |
| cg06744585 | -.0004091 | .1982457 | -.0020072 | .3662551 |
| cg08326019 | -.0005388 | .458971 | .0044138 | .3850308 |
| cg19617213 | .0003469 | .4400268 | -.0022775 | .4679457 |
| cg11666770 | .0000728 | .7800121 | -.0000382 | .9832731 |
| cg05852395 | .0000685 | .743085 | .0000766 | .9581704 |
| cg02158978 | .0004352 | .1709364 | .0000813 | .9708091 |
| cg22805485 | -.0002078 | .6254255 | .0023828 | .4226967 |
| cg17427926 | -.0002511 | .2042948 | -.0013396 | .3323368 |
| cg26910511 | -.0000207 | .9601787 | .0024606 | .3941655 |
| cg04345034 | .0002532 | .3263855 | .0036078 | .0449492 |
| cg14455176 | -.0003023 | .1989801 | .0023031 | .161165 |
| cg22163280 | -.0000857 | .664623 | .0003348 | .8084426 |
| cg14295482 | -.0000795 | .7575527 | .0008876 | .6217493 |
| cg21201401 | .0000621 | .8411303 | .0004525 | .8343415 |
| cg10201370 | -.0002059 | .2836486 | -.000781 | .5604516 |
| cg23647554 | .0002422 | .5124304 | .0000383 | .9881836 |
| cg13066703 | .0002235 | .5273839 | -.0008394 | .7339813 |
| cg02996583 | -.0004356 | .3145033 | -.0013957 | .6446307 |
| cg20493718 | -.0002341 | .4331323 | .000928 | .6564624 |
| cg14689317 | -.0000156 | .9275684 | -.00018 | .8809801 |
| cg12582317 | -.0003236 | .4645945 | .0008065 | .7941868 |
| cg27485596 | .0004623 | .4282556 | .0055834 | .1704441 |
| cg24159436 | .0006687 | .0606807 | .0014838 | .5518651 |
| cg20513976 | .0004895 | .04775 | .0013125 | .4480493 |
| cg24524285 | -.0003872 | .3117735 | .0070328 | .0083161 |
| cg23925513 | -.0001934 | .3554412 | .0008088 | .5801962 |
| cg03497652 | -.0004905 | .1453197 | -.0040034 | .0886436 |
| cg14625581 | -.0003908 | .2165563 | .0011997 | .587284 |
| cg15445952 | .0004367 | .2877663 | .0002451 | .9319519 |
| cg07262247 | -.0004209 | .1055522 | -.0006008 | .7411399 |
| cg14321492 | -.0000227 | .9521838 | -.0013471 | .6109511 |
| cg26240885 | -.0002618 | .6887911 | -.0054121 | .2355924 |
| cg05960182 | .0001546 | .6399909 | -.0000434 | .9849905 |
| cg19816586 | .0003506 | .458704 | .0004828 | .8838798 |
| cg12373600 | -.0002144 | .3024815 | -.0000135 | .9926016 |
| cg17542517 | .0004837 | .0710239 | -.0014567 | .4369388 |
| cg25715278 | .0001757 | .6925935 | -.0025873 | .4042863 |
| cg09611279 | .0009577 | .0356384 | .0001698 | .9575569 |
| cg24181728 | .0002914 | .5253981 | -.0028199 | .3787735 |
| cg19175928 | .0002528 | .4553597 | -.0016871 | .4756654 |
| cg02646480 | -.0000984 | .704546 | .0008933 | .6220883 |
| cg22504849 | .000138 | .5305799 | -.0024903 | .1047716 |
| cg19750657 | .0002865 | .4608009 | -.0026385 | .3306159 |
| cg15756156 | -.0003833 | .2507787 | -.001344 | .5644609 |
| cg26077811 | -.0004833 | .1317902 | -.0008152 | .7161788 |
| cg12999836 | .0002941 | .4787562 | -.003812 | .1884743 |
| cg13932501 | .0003548 | .3977278 | .0008658 | .7677076 |
| cg01786973 | -.0002878 | .6239425 | -.0015973 | .6968839 |
| cg09179277 | .0011538 | .0479268 | .0055072 | .176907 |
| cg09964698 | -.0005961 | .1595979 | -.0052734 | .0746668 |
| cg04414297 | .0006204 | .1476295 | .0003996 | .8938825 |
| cg24215459 | -.0003305 | .2060543 | -.0018298 | .3162844 |
| cg25255847 | .0003172 | .4617958 | .0008114 | .7876161 |
| cg24758545 | -.0001887 | .4532994 | -.0019805 | .2596745 |
| cg23182003 | .0001085 | .8096425 | .0016038 | .610112 |
| cg22502704 | .0001715 | .6245225 | .0022852 | .3503246 |
| cg05339856 | .0000886 | .6038583 | -.0010574 | .3753341 |
| cg09207960 | .000161 | .573799 | -.0004864 | .8078035 |
| cg01583875 | .000649 | .1175326 | .0025041 | .3875981 |
| cg23356411 | .0000696 | .8333723 | -.0017222 | .4558321 |
| cg01470610 | .0003186 | .2246592 | -.0018693 | .3078273 |
| cg02493508 | .0002544 | .707372 | -.0045368 | .3377042 |
| cg27005487 | -.0001628 | .5851414 | .0003818 | .8546321 |
| cg11129439 | -.0000968 | .6696647 | -.0024708 | .1187291 |
| cg16289642 | .0000402 | .9284338 | -.0000609 | .984453 |
| cg08565703 | .000184 | .5006418 | -.0025037 | .1891713 |
| cg16993186 | -.000244 | .422376 | -.0011482 | .588937 |
| cg25230907 | .0000493 | .8554512 | .0011518 | .5423175 |
| cg00866476 | .0004211 | .176983 | .0004587 | .8333743 |
| cg02522196 | .0001974 | .2934674 | -.0028664 | .0286633 |
| cg00052692 | .0010495 | .0501928 | .0055452 | .1388046 |
| cg06150841 | .000058 | .8100043 | -.0015623 | .3534709 |
| cg17100197 | .0005287 | .2196197 | -.0014533 | .6292483 |
| cg06791426 | -.000029 | .9322254 | -.0027002 | .2557696 |
| cg20622131 | -.0001002 | .6452299 | -.0009381 | .5371736 |
| cg19118972 | -.0002387 | .3584161 | -.0025809 | .154792 |
| cg13586051 | .0001607 | .6031661 | .0005013 | .8163996 |
| cg09527904 | -.0000953 | .7637293 | -.0026418 | .232509 |
| cg08787832 | -.0004627 | .1119234 | -.0013099 | .5198644 |
| cg07904429 | .0005264 | .2674238 | -.0003654 | .9122975 |
| cg24942683 | .0002973 | .4826853 | -.0011394 | .7001024 |
| cg14681242 | -.0000431 | .8967022 | -.0027967 | .2276043 |
| cg19155346 | -.0002423 | .4936787 | -.0011226 | .6499031 |
| cg15774976 | .000394 | .3537175 | .0047368 | .1101369 |
| cg08735211 | -.0001096 | .8386678 | -.0009732 | .7957332 |
| cg21404980 | .0006277 | .0776176 | .0015607 | .5304091 |
| cg01537248 | .0000149 | .9372138 | -.0012098 | .3598699 |
| cg13554864 | .0000476 | .884857 | -.003775 | .0993817 |
| cg06350844 | .0000669 | .8427492 | .0008253 | .7259849 |
| cg00327947 | .0004001 | .2289866 | .0036796 | .1129465 |
| cg26052321 | .000112 | .7061628 | -.0030832 | .1369601 |
| cg24916358 | .0001747 | .6087918 | .0000925 | .9690571 |
| cg27295118 | .0005852 | .3952812 | .0008141 | .8655798 |
| cg10688057 | .0002648 | .3895615 | .0002259 | .9163274 |
| cg12684547 | .0008541 | .0452257 | .0021648 | .4681868 |
| cg04286826 | .0003172 | .4204369 | -.0011378 | .6791101 |
| cg08054094 | .0002772 | .4588293 | -.0050286 | .0539901 |
| cg12713583 | .0007263 | .2548603 | -.0038965 | .3819087 |
| cg06915331 | .0001406 | .6784453 | .0003908 | .8689787 |
| cg14460183 | .0003688 | .1073042 | -.0009509 | .552595 |
| cg13687834 | .0007804 | .099551 | .0010362 | .7545161 |
| cg00382138 | .0003376 | .5404744 | -.0001985 | .9589061 |
| cg19777352 | .0003102 | .3302709 | .0019621 | .3780134 |
| cg04852824 | .0002501 | .3921339 | .0028193 | .1669959 |
| cg18641655 | .0000979 | .7569221 | -.0030259 | .1703254 |
| cg21657580 | -.0006264 | .1580418 | -.005833 | .0596191 |
| cg17738521 | -.0002735 | .4097249 | -.0036731 | .1126155 |
| cg14868453 | -.0002756 | .3687484 | -.0025899 | .2263696 |
| cg03353442 | .0001969 | .6166901 | -.0016864 | .5393044 |
| cg18788940 | -.0001676 | .641228 | -.0057947 | .0207144 |
| cg02609480 | -9.61e-06 | .9786713 | -.0013508 | .5905605 |
| cg21363233 | .0006529 | .2117218 | -.0021539 | .5555407 |
| cg08025812 | .0006341 | .0359732 | -.0009748 | .6450604 |
| cg13954212 | .000044 | .8717805 | -.0040679 | .0322767 |
| cg09827745 | .0004783 | .2002703 | -.003361 | .1975801 |
| cg04488894 | .0003435 | .5440474 | -.0009478 | .810627 |
| cg03566881 | .0004805 | .046141 | .0005737 | .7337003 |
| cg07283598 | -.0001427 | .5914779 | -.0011924 | .5208446 |
| cg19360969 | -.000342 | .3369715 | -.0009098 | .7147313 |
| cg14964970 | .0001008 | .7441505 | -.0027255 | .2059167 |
| cg14267542 | .0006123 | .0181619 | .0012916 | .4767224 |
| cg06357993 | .0003863 | .0968306 | -.0008335 | .6084369 |
| cg14214856 | .0004894 | .1671729 | -.0016775 | .4981091 |
| cg04037585 | -.0005937 | .2035444 | -.0029831 | .3605361 |
| cg12732215 | .0000272 | .9472734 | .0023463 | .414004 |
| cg17344149 | .0001971 | .5948867 | .0001362 | .958023 |
| cg17417675 | .0008108 | .1037164 | .0024422 | .4833603 |
| cg01135863 | .000151 | .6601309 | -.0000205 | .9931779 |
| cg01824466 | -.0002119 | .6572042 | .0014027 | .6740239 |
| cg23355492 | -.0000908 | .8052282 | -.0039035 | .1287937 |
| cg11646706 | .0005584 | .3298764 | -.0025486 | .5243859 |
| cg11404658 | .0001862 | .3587228 | .0018033 | .2029883 |
| cg09143713 | .0007542 | .0373052 | -.0005981 | .8134849 |
| cg10972127 | -.0000617 | .8380598 | -.0016661 | .4293904 |
| cg00289969 | -.0002948 | .2953655 | -.0009704 | .6220375 |
| cg00506306 | .0001341 | .8083869 | -.0049871 | .1962324 |
| cg23007418 | -.0002969 | .2978371 | -.0002035 | .9186773 |
| cg00743641 | -.0002322 | .4512015 | .0001247 | .953815 |
| cg09162537 | -.0006778 | .0693365 | -.0063356 | .014936 |
| cg03750061 | .0004182 | .20977 | .0021911 | .346944 |
| cg25676030 | -.000094 | .8150594 | -.0006024 | .8301116 |
| cg10726445 | -.0001637 | .6502714 | .000257 | .9188243 |
| cg05211189 | .0006671 | .1934876 | .0027066 | .4502945 |
| cg08419476 | .000418 | .4515289 | -.0002627 | .9459915 |
| cg11864558 | -.0002264 | .559766 | -.0028014 | .3013161 |
| cg06508940 | .0006962 | .1782642 | .0011108 | .7586619 |
| cg08922737 | .0001922 | .6101419 | -.0005239 | .8422558 |
| cg03038262 | -.0003753 | .2138709 | -.0005442 | .7965122 |
| cg08398200 | .0000594 | .8814483 | -.0000646 | .9814694 |
| cg11457651 | .000238 | .394963 | -.0002547 | .8963093 |
| cg12197666 | .0001165 | .7670876 | -.001851 | .5002475 |
| cg14656043 | -.0002358 | .5487489 | -.002244 | .413833 |
| cg20393308 | -.000256 | .5631444 | -.0081404 | .0082513 |
| cg10501189 | .0003071 | .3950936 | -.000867 | .731126 |
| cg03245099 | .0005025 | .3866504 | -.0009704 | .8108769 |
| cg07738730 | .0001862 | .7250966 | .0012658 | .7321983 |
| cg05988980 | .0001126 | .7246972 | -.0025764 | .2484428 |
| cg06233873 | .0002422 | .7229501 | -.0001765 | .9704962 |
| cg09352285 | .0004744 | .150797 | -.0006944 | .7635781 |
| cg13750140 | .0005845 | .089467 | -.0001706 | .9435092 |
| cg05961022 | .0001909 | .5533973 | -.0027747 | .2172132 |
| cg05325218 | .0002751 | .3015639 | -.001577 | .3965082 |
| cg06653796 | .0001984 | .5082316 | -.0003856 | .8539572 |
| cg00766824 | .0003072 | .4665375 | -.0032717 | .2667226 |
| cg04118945 | .001187 | .0938491 | -.0031419 | .5259557 |
| cg12915036 | .0002061 | .6329777 | -.0019424 | .5193526 |
| cg15565234 | -.0001462 | .542174 | -.0032955 | .0486856 |
| cg02794319 | .0002646 | .5803384 | .0037222 | .2652659 |
| cg19264571 | .0001913 | .678443 | .0025607 | .4268489 |
| cg04174091 | -.0002932 | .3580133 | .003846 | .0839309 |
| cg20782117 | -.0001653 | .7425694 | -.0016345 | .6418884 |
| cg11166877 | .0003236 | .1215018 | .0004057 | .7812536 |
| cg19913563 | .0002519 | .6223043 | -.0031417 | .3789774 |
| cg18183624 | -.0000992 | .8635219 | -.0005204 | .8972861 |
| cg10153349 | -.000306 | .3842132 | .0011888 | .6284518 |
| cg03048432 | -.0001371 | .765836 | .0044831 | .1627516 |
| cg21002460 | -.0002481 | .495794 | -.0026749 | .292882 |
| cg20512303 | -.0003257 | .248971 | .0001039 | .9580216 |
| cg01505367 | -.0002394 | .3245076 | -.0007906 | .6414955 |
| cg05493528 | .0000889 | .8688816 | -.0025322 | .5006097 |
| cg09673812 | .0003121 | .4420437 | .0031654 | .2641397 |
| cg07383652 | .0002058 | .6584314 | -.0030853 | .3424086 |
| cg13897325 | -.000025 | .8891577 | -.0020536 | .1005069 |
| cg10248470 | -.0001819 | .6017563 | -.0001787 | .9414958 |
| cg22434421 | -.0000995 | .732565 | -.0025841 | .2035657 |
| cg26893515 | .0001407 | .6855627 | -.0035612 | .1420178 |
| cg17945422 | -.0003195 | .5134445 | -.0040525 | .2350741 |
| cg20858400 | .00039 | .2758909 | -.0008221 | .7423881 |
| cg12434846 | .0001285 | .7348093 | -.001553 | .5577566 |
| cg03425812 | -.0000424 | .9139179 | -.000632 | .8174265 |
| cg09565444 | .0003599 | .264466 | .0005288 | .8145295 |
| cg08255481 | .000042 | .8878242 | .0025165 | .2263056 |
| cg20258698 | -.0003823 | .4864123 | -.0013799 | .7190881 |
| cg00361159 | .0001113 | .7429475 | -.0001822 | .9387374 |
| cg23911696 | .0002269 | .4706205 | -.0007844 | .7210659 |
| cg05636663 | -.0006703 | .1174188 | -.0049952 | .094734 |
| cg19274030 | .0007663 | .1796027 | -.001738 | .6632648 |
| cg14377059 | .0001485 | .6533824 | -.0031874 | .1672806 |
| cg23461488 | -.0001937 | .4773032 | -.0011398 | .5495 |
| cg12635790 | .0001724 | .6485412 | -.0000142 | .9957056 |
| cg09361367 | .0002481 | .438325 | .0015978 | .4749207 |
| cg12148585 | .0006122 | .170646 | -.0028468 | .3618961 |
| cg16124934 | -.0000987 | .7291534 | .0029469 | .1384604 |
| cg09331651 | .0002159 | .665195 | -.0018796 | .5896026 |
| cg19590421 | -.0004687 | .1859012 | -.0009067 | .7143216 |
| cg15612266 | -.000173 | .6886535 | .0026725 | .3752906 |
| cg08403778 | -8.50e-06 | .9533535 | -.000281 | .781872 |
| cg09154880 | 8.09e-06 | .9780149 | -.0021685 | .2898325 |
| cg00948111 | -.0000899 | .8093293 | -.0044531 | .0864773 |
| cg10354154 | .0002552 | .5120516 | .0009899 | .7158024 |
| cg12205270 | -.0004882 | .2032888 | -.0009248 | .7302371 |
| cg08866634 | .000157 | .5987565 | -.0015192 | .4658127 |
| cg03892117 | -.0002808 | .4640732 | .0005419 | .8397434 |
| cg05351447 | .0000784 | .8316949 | -.0030959 | .2291857 |
| cg23380308 | .0001389 | .7055746 | .0006413 | .8027201 |
| cg26886572 | .0004198 | .3424113 | .0016648 | .5899339 |
| cg25551168 | .0002298 | .5555497 | .0018484 | .4972216 |
| cg12428797 | .0005517 | .2192856 | .0025002 | .4255867 |
| cg22411549 | .0004521 | .3427562 | -.0022562 | .4979365 |
| cg01673485 | .0002004 | .5859162 | .0020925 | .415306 |
| cg01586330 | .0002047 | .5190712 | -.0029066 | .1896205 |
| cg04567124 | -.0001228 | .64856 | -.0009527 | .6127477 |
| cg12595459 | .0002904 | .4008618 | -.0017703 | .4634987 |
| cg18728406 | .0000357 | .8882607 | .0011632 | .512633 |
| cg00166343 | -.0000135 | .9654996 | -.0017203 | .428802 |
| cg19193422 | -.0002809 | .4548594 | -.0018434 | .4824944 |
| cg07722523 | .0005349 | .1152169 | .0008381 | .7241129 |
| cg27555390 | -.0000391 | .8605928 | -.0011721 | .4512287 |
| cg21146761 | -.0002059 | .4176109 | -.0014034 | .4289199 |
| cg20143040 | .0003 | .51703 | -.0031431 | .3309051 |
| cg02863072 | .0004309 | .1950691 | .0008043 | .7293666 |
| cg10020892 | .000479 | .2154744 | -.0001298 | .9617146 |
| cg01110172 | -.0000822 | .7187212 | -.002529 | .1120108 |
| cg10394757 | -.0003659 | .1059075 | .0002978 | .8507537 |
| cg26931934 | -.0002202 | .5202223 | -.0003516 | .8831223 |
| cg21155834 | .0004738 | .0715895 | -.0007745 | .6737702 |
| cg06583577 | .000111 | .7544089 | -.0028452 | .2508029 |
| cg04714030 | .0000995 | .788777 | .0006147 | .8126068 |
| cg21986657 | .000094 | .8126891 | .0008093 | .7701795 |
| cg06687489 | .0010136 | .0126353 | .0030887 | .2778227 |
| cg22692692 | .0002176 | .6019336 | -.0020873 | .4737405 |
| cg20563452 | .0000771 | .7579516 | -.0014309 | .4126426 |
| cg18422587 | .0003336 | .4583748 | .0022333 | .4772548 |
| cg12417775 | -.0004248 | .1941066 | -.0044093 | .0534005 |
| cg25049210 | .0013115 | .0808421 | .0032925 | .5308704 |
| cg18158306 | .0002775 | .4127517 | -.0009923 | .6750883 |
| cg23539450 | -.0004565 | .051907 | -.0018761 | .2532858 |
| cg02256034 | .0000983 | .7445981 | .0013088 | .5346093 |
| cg16399664 | .0002126 | .5746724 | -.0026691 | .3128605 |
| cg21132686 | -.0001894 | .5486078 | -.0016311 | .4595854 |
| cg25900017 | -.0000622 | .7589005 | -.0012854 | .3637476 |
| cg15335617 | -8.41e-06 | .9709811 | -.001514 | .3483224 |
| cg03584098 | .0001023 | .6031182 | -.0007766 | .5718131 |
| cg26724018 | .0000626 | .8823107 | -.0026994 | .3604355 |
| cg13733403 | -.000067 | .7979501 | .0014323 | .433113 |
| cg13100918 | .0001078 | .5017458 | -.000422 | .7065454 |
| cg09150130 | .0005334 | .22006 | -.0003407 | .9107748 |
| cg19839221 | -.0000655 | .88631 | .0025358 | .4276741 |
| cg08450478 | -.0010494 | .0055441 | -.0057973 | .0284881 |
| cg22894232 | .0004253 | .425249 | .0013217 | .7227986 |
| cg06512316 | -.0006719 | .2153743 | -.0054961 | .1466604 |
| cg13136655 | -.000191 | .5441234 | -.0014034 | .5234308 |
| cg12758082 | .0000559 | .82296 | -.0027463 | .115353 |
| cg02753354 | .0000298 | .9181889 | -.0029035 | .1516387 |
| cg11960794 | .0004455 | .3470128 | -.0027589 | .4043946 |
| cg12331471 | .0000837 | .8309286 | -.0008574 | .7542619 |
| cg10582712 | -.0001298 | .7128574 | -.0011811 | .6316086 |
| cg10715311 | .0001761 | .3442117 | -.0005465 | .6743557 |
| cg02577793 | .000565 | .1930356 | .0001572 | .9586968 |
| cg04753874 | .0007856 | .091118 | .0014832 | .6483436 |
| cg21137446 | .0000321 | .9147111 | .0024847 | .2346012 |
| cg17133774 | .0005302 | .2042982 | -.0032396 | .2668749 |
| cg23913963 | .0001446 | .5554839 | .0017581 | .30445 |
| cg03208825 | -.0001708 | .6447901 | -.0028893 | .2638972 |
| cg07052063 | .0004072 | .2343694 | -.0005467 | .8192942 |
| cg16300030 | -.0000686 | .8588119 | -.0022579 | .4019032 |
| cg00464852 | .0008046 | .0425869 | .0010971 | .6927921 |
| cg22471376 | -.0001854 | .3422627 | -.002566 | .0594302 |
| cg25693349 | .0000692 | .85588 | .0022226 | .4031348 |
| cg18587063 | -.0000281 | .9370492 | -.0000792 | .9745274 |
| cg19396666 | .0006588 | .0513565 | .0026775 | .2575085 |
| cg23196549 | -.0007817 | .0594094 | -.0038402 | .1852509 |
| cg06060560 | .0001944 | .7093505 | .0014459 | .6913996 |
| cg02669047 | -.0000853 | .7296664 | -.0036325 | .0346834 |
| cg16098726 | -.0001044 | .7177907 | -.0009276 | .6458277 |
| cg26027170 | .0005881 | .0687972 | -.0012131 | .591526 |
| cg00541544 | .0001176 | .7137664 | .0008069 | .7185866 |
| cg08204891 | .000114 | .5146943 | -.00103 | .3993841 |
| cg09024656 | .0000385 | .9257842 | -.0039318 | .1722516 |
| cg03170737 | -.000604 | .2678185 | -.0107539 | .0045841 |
| cg01795822 | .0005151 | .250219 | -.0023539 | .4520656 |
| cg04972616 | -.0001402 | .3312564 | -.0005793 | .5655478 |
| cg00420390 | .0003307 | .1526244 | -.0004981 | .7579725 |
| cg17381396 | .0003223 | .3822813 | -.0029502 | .2520521 |
| cg04388124 | .0002687 | .4779612 | -.000148 | .9553927 |
| cg15064151 | .0000938 | .7694421 | .0000312 | .9888742 |
| cg07408552 | .0000948 | .7240915 | .0004074 | .8279818 |
| cg26974062 | .0013242 | .038535 | .0140244 | .0016518 |
| cg03124318 | -1.80e-06 | .9947363 | -.000731 | .700451 |
| cg03795071 | -.0000733 | .8519105 | -.0029472 | .2821218 |
| cg11439393 | .0002825 | .3748222 | -.001158 | .6025581 |
| cg12259187 | -.0000702 | .7997245 | -.0026722 | .1662871 |
| cg01899130 | -.0003813 | .619151 | -.0041164 | .4422205 |
| cg12517732 | .0002895 | .6390236 | -.0012071 | .7794549 |
| cg05661346 | -.0001456 | .6032487 | -.0001825 | .925699 |
| cg08354137 | -.0000807 | .7791997 | -.003976 | .0475793 |
| cg27633342 | .0004053 | .2266842 | .000644 | .7834057 |
| cg00723306 | .0001946 | .2435244 | -.0001756 | .8803372 |
| cg16063640 | .0001924 | .5204349 | .0001082 | .9587387 |
| cg24873093 | .0005777 | .129886 | .001095 | .6813963 |
| cg01083159 | .0003303 | .3617077 | .0008441 | .7386299 |
| cg02460440 | -.000203 | .576965 | .0014514 | .5678894 |
| cg23042221 | -.0001675 | .7353103 | -.0014785 | .6691327 |
| cg15961007 | .0000956 | .8127437 | .0019585 | .4868397 |
| cg05368730 | .0006393 | .0356528 | -.0042955 | .0433082 |
| cg05562612 | -.0001774 | .631273 | -.001696 | .5112817 |
| cg22907232 | -.000107 | .8291243 | -.0026659 | .4413239 |
| cg00482389 | -.0000424 | .7980829 | -.0009607 | .4065576 |
| cg11046734 | .0004853 | .210256 | -.002541 | .3477942 |
| cg02542684 | .0001697 | .5555516 | -.0013245 | .5100412 |
| cg18679416 | .0000532 | .8531211 | -.0017102 | .3939101 |
| cg13674249 | .0002604 | .2998364 | -.001121 | .5229942 |
| cg10461390 | .0008137 | .1866711 | -.0009554 | .82446 |
| cg27455061 | .0000747 | .6115124 | -.0000212 | .9835265 |
| cg24676398 | .0006005 | .1125317 | .0010566 | .68968 |
| cg08236655 | .0000541 | .8783429 | -.0024314 | .3239618 |
| cg08576185 | .0004328 | .3069734 | .0020556 | .4873983 |
| cg25368836 | -.000589 | .0761946 | -.0017148 | .4604152 |
| cg16843099 | -.0002854 | .4644079 | .0002254 | .9340878 |
| cg17680767 | .000043 | .9060227 | -.0019256 | .449044 |
| cg14883541 | .0003278 | .1552693 | -.0019506 | .2260437 |
| cg14436379 | .0003716 | .4250033 | -.0003961 | .9031224 |
| cg19240637 | .0003502 | .3065627 | -.0027651 | .2476416 |
| cg25017876 | .0004473 | .4122405 | -.0009961 | .7938375 |
| cg16705546 | .0004456 | .3156369 | .0003292 | .9155082 |
| cg06151074 | .0003212 | .2322275 | .0006186 | .742031 |
| cg08356855 | -.0000118 | .968923 | .0006269 | .7667546 |
| cg26700386 | -.0000896 | .7253793 | -.0030241 | .0891795 |
| cg08951931 | .0000922 | .7732497 | -.0018406 | .4100023 |
| cg01601105 | .0001228 | .6307522 | -.0016723 | .3483768 |
| cg12405088 | .0002959 | .6313249 | -.0029441 | .4942462 |
| cg21640060 | .0005042 | .2713066 | -.0028017 | .3815659 |
| cg18137347 | .0006832 | .129353 | -.0029103 | .3553004 |
| cg15031003 | .0003653 | .182785 | -.0019002 | .3213228 |
| cg24351658 | -.0000232 | .910064 | -.0012771 | .3730591 |
| cg13492133 | -.0002111 | .6452225 | -.0023312 | .4664751 |
| cg01895805 | -.0001972 | .5401564 | .0001213 | .9569798 |
| cg01618988 | -.0005975 | .2115325 | -.0114668 | .0005571 |
| cg26134300 | .0007717 | .1645125 | -.0043029 | .2672718 |
| cg09530217 | -.0002048 | .7002442 | -.003816 | .3041443 |
| cg25586410 | .0008049 | .0757391 | -.0025211 | .4263683 |
| cg21180953 | .0001449 | .7335815 | -.0046123 | .1204657 |
| cg07878065 | -.0003853 | .2102193 | -.0027128 | .2065887 |
| cg04727199 | .0000323 | .9507363 | .0023381 | .5220928 |
| cg21710324 | .0001346 | .5299111 | -.0009807 | .5122079 |
| cg13327844 | .0002938 | .5119887 | -.0011061 | .7237885 |
| cg21945188 | -.0000149 | .9746877 | -.0028211 | .3882319 |
| cg00717259 | -.0002081 | .5768769 | -.0038713 | .136868 |
| cg23750151 | .0005719 | .1617917 | .0017196 | .5472665 |
| cg16009632 | .0001346 | .6293122 | -.0031027 | .1105771 |
| cg22523078 | -.0001427 | .4682438 | .0007361 | .5923121 |
| cg19744173 | .000371 | .2118437 | -.0019305 | .3524233 |
| cg09454417 | -.0000513 | .9020129 | -.0020815 | .474107 |
| cg13067635 | .0005825 | .0673629 | -.0010876 | .6253709 |
| cg14925616 | -.0004339 | .1945003 | -.0011418 | .6252401 |
| cg04943374 | .0007534 | .0702523 | .0002528 | .9308158 |
| cg26095923 | -.0001257 | .7943869 | .0008805 | .7937847 |
| cg07624582 | .0007665 | .1208219 | .0026645 | .4404919 |
| cg09413378 | .0001365 | .5851029 | -.0021696 | .2138266 |
| cg09278484 | -.0004592 | .2987158 | -.0010752 | .7276915 |
| cg22240695 | .000091 | .7489442 | -.0024977 | .2080319 |
| cg00528492 | .0000193 | .9398879 | .0003162 | .8597238 |
| cg04948906 | -.0001349 | .5590781 | .0001139 | .9436835 |
| cg12592220 | .0000424 | .9084867 | -.0017221 | .5037547 |
| cg24810429 | .0000151 | .9599732 | -.0009745 | .6417951 |
| cg21945120 | .0005609 | .253585 | -.0006159 | .8576313 |
| cg07249182 | .0001857 | .6496998 | -.0028049 | .3258948 |
| cg25954315 | .0002907 | .3394008 | -.0031172 | .1421958 |
| cg15445281 | -.0000456 | .9073873 | .0015151 | .5795968 |
| cg14511702 | -.0005665 | .0235141 | -.0024845 | .1555792 |
| cg24129356 | -.0000113 | .982134 | -.0005545 | .8750905 |
| cg25201165 | .0002964 | .5002988 | .0010511 | .7322067 |
| cg27478579 | .0000579 | .8288996 | -.0003169 | .865444 |
| cg07377446 | -.0004104 | .1746236 | -.0066002 | .0016963 |
| cg17451586 | .0001525 | .6416925 | -.0007658 | .7379824 |
| cg00009602 | .0004935 | .1312192 | .0009673 | .6722257 |
| cg09964886 | .0000781 | .7785241 | -.000459 | .8130114 |
| cg02019495 | -.0000359 | .8881751 | -.0006972 | .6954317 |
| cg24914185 | .00023 | .523845 | -.0000285 | .9909788 |
| cg21481637 | .0003462 | .2703782 | -.0003164 | .8854045 |
| cg12822891 | -.000342 | .4064507 | .0006663 | .8169173 |
| cg08851848 | .0004187 | .2745465 | -.0004316 | .8719597 |
| cg02735762 | -.000019 | .921379 | .000975 | .4671938 |
| cg27109588 | .0005309 | .160319 | .004081 | .122186 |
| cg16014031 | -.0002978 | .4945685 | .0014692 | .6294457 |
| cg02177087 | .0002899 | .1756901 | .0007486 | .6168511 |
| cg12950368 | -.0001407 | .6500383 | -.000936 | .6657212 |
| cg15877233 | -.0001818 | .5544136 | -.0032507 | .1298539 |
| cg27509293 | .0000124 | .96742 | -.002167 | .3060326 |
| cg05394561 | .0004637 | .2051131 | -.0026927 | .2922735 |
| cg27327370 | -.0000241 | .9146214 | .0011835 | .450148 |
| cg26351826 | .0003658 | .3154314 | -.0017494 | .4919128 |
| cg00452806 | .0006186 | .1163584 | -.0023318 | .3971688 |
| cg02368788 | -.0005344 | .3205337 | .001104 | .76899 |
| cg04740205 | .0007668 | .0571434 | .0023764 | .3993658 |
| cg27518892 | .0002256 | .4693808 | -.0019028 | .3823227 |
| cg00869550 | .000139 | .6121404 | -.0005761 | .7635444 |
| cg07363914 | .0002984 | .1079612 | .0003195 | .805604 |
| cg12264322 | -.0004913 | .2423894 | .0011333 | .6995952 |
| cg00921839 | -.0000556 | .9311672 | -.0014896 | .7405368 |
| cg18402166 | .000191 | .5282338 | -.0004002 | .8499421 |
| cg12718972 | .0000188 | .9575279 | -.0019235 | .4355237 |
| cg06419239 | -.0005369 | .1145684 | .0004736 | .8422059 |
| cg16890093 | .0000227 | .9266179 | .0007093 | .6808044 |
| cg02571874 | .0003899 | .3137829 | .0002685 | .9209421 |
| cg07807026 | .0002749 | .3664275 | -.0018707 | .3788534 |
| cg12338887 | .00008 | .7871522 | -.0014903 | .4714369 |
| cg20020452 | .000324 | .2867535 | -.0048524 | .0220731 |
| cg16326902 | -.0000765 | .8313211 | .0019969 | .4260884 |
| cg22328850 | -.0001849 | .7247206 | -.0020888 | .568931 |
| cg18749651 | -.0002655 | .4497492 | -.0015247 | .5343381 |
| cg15393364 | .0001594 | .5229898 | -.0000699 | .9680219 |
| cg15896766 | .0003675 | .2849678 | -.0022345 | .3519669 |
| cg03047995 | .0001705 | .6680996 | -.0025572 | .3570469 |
| cg26590588 | -.0005107 | .2051711 | -.004484 | .1110621 |
| cg22650425 | 1.74e-06 | .9939792 | -.0017225 | .2854992 |
| cg16964184 | .0006835 | .1705739 | -.0015301 | .6607761 |
| cg00525964 | .0001989 | .6361585 | -.0023052 | .4324159 |
| cg06511149 | .0005114 | .1138032 | .0016674 | .4608809 |
| cg02240291 | -.000462 | .1925618 | -.0007101 | .7744694 |
| cg25937862 | -.0000367 | .8633711 | -.0005523 | .7104437 |
| cg04929355 | -.0000179 | .9662455 | -.0014591 | .6204912 |
| cg16195519 | -.0003717 | .2554578 | -.005493 | .0158809 |
| cg17372327 | -.0000308 | .9125854 | -.0012614 | .5192215 |
| cg17394978 | .0002608 | .5204386 | -.0024105 | .3950463 |
| cg25156118 | -.0002927 | .4692219 | .0032914 | .2437188 |
| cg18878242 | .000155 | .7626443 | -.0043585 | .2237281 |
| cg11415687 | .0002245 | .2984649 | -.0004029 | .7893879 |
| cg00872144 | -.000302 | .3006023 | -.0035903 | .0777885 |
| cg18623216 | .0008259 | .1790416 | .0003265 | .9394253 |
| cg23639499 | .0000973 | .7288724 | -.0002848 | .8844571 |
| cg20734092 | .000429 | .4832113 | .0007428 | .8620346 |
| cg21458064 | .0002237 | .4532973 | -.0001809 | .9308239 |
| cg24803390 | .0013943 | .0044787 | .0033153 | .3349971 |
| cg15556213 | -.0001744 | .6088546 | .0001015 | .9659974 |
| cg23366191 | -.0002347 | .5105678 | -.000765 | .7588922 |
| cg06922359 | -.0001928 | .3549255 | -.0021808 | .1338584 |
| cg08960443 | .0010656 | .0247304 | -.0027282 | .4114717 |
| cg07805345 | -.000127 | .6435914 | -.0011612 | .5445585 |
| cg16002234 | .0003969 | .5197234 | .0032536 | .4498555 |
| cg23638139 | -.0001141 | .7192967 | .001726 | .4362671 |
| cg27239243 | .0002952 | .2344289 | -.0017708 | .3072642 |
| cg00406098 | .0014971 | .0161014 | .0039698 | .362105 |
| cg14258501 | .0002124 | .5830245 | -.0035525 | .1883268 |
| cg06951727 | .0003126 | .1611628 | -.0024099 | .1219291 |
| cg16167422 | -.0004452 | .4021483 | -.0026253 | .479403 |
| cg03295554 | -.0003175 | .5199624 | -.0002067 | .9521967 |
| cg18214661 | -.0000793 | .8508404 | -.0028975 | .3251422 |
| cg13247871 | -.0001094 | .7336226 | -.002266 | .312769 |
| cg16342853 | -.0000993 | .7358714 | -.000705 | .731672 |
| cg03665151 | .0001605 | .7211971 | -.0023152 | .4611203 |
| cg00841845 | .0004953 | .3431649 | -.0051519 | .1577928 |
| cg10261512 | .0002139 | .4265656 | -.0018419 | .3268402 |
| cg05059607 | .0004234 | .3719861 | -.0008375 | .8004826 |
| cg19566482 | -.0001668 | .7281505 | -.0026601 | .4273829 |
| cg03006193 | -.0005934 | .1353745 | -.0018572 | .5037987 |
| cg19551561 | .0008743 | .097194 | .0038061 | .3016361 |
| cg12856497 | .0004999 | .2237571 | -.0028128 | .3271142 |
| cg15781526 | -8.60e-06 | .9734178 | .0003408 | .8500308 |
| cg13532547 | -.0000877 | .8286432 | .0025741 | .3625936 |
| cg25975961 | .000571 | .4679447 | .001626 | .767315 |
| cg19152802 | .0007586 | .0883196 | -.0006744 | .8285083 |
| cg13377771 | .0002395 | .5066301 | -.0016979 | .5003173 |
| cg16345559 | -.0003712 | .2079825 | .0006328 | .7587909 |
| cg08435674 | -.0004629 | .1895991 | -.0002106 | .9319853 |
| cg20409231 | .0007052 | .1407349 | .00044 | .8954335 |
| cg16103712 | .0013362 | .0345919 | -.0004608 | .9170876 |
| cg26195586 | .0001438 | .6491843 | -.0018139 | .4110737 |
| cg19333758 | .0004818 | .2770816 | -.0028286 | .3610344 |
| cg13641317 | .0003252 | .1892278 | -.0016974 | .3267328 |
| cg11729363 | .0000594 | .8905245 | .0006669 | .8249942 |
| cg04225775 | .0007685 | .0115795 | -.0013356 | .5310943 |
| cg26708427 | .0000867 | .7277317 | -.0011436 | .5106462 |
| cg06843189 | .0000982 | .7944478 | -.0014542 | .5806128 |
| cg06642155 | .0006224 | .0217771 | -.0001546 | .9351521 |
| cg15793688 | -.0004707 | .3361884 | -.0108877 | .0013724 |
| cg11147940 | .0002423 | .4567395 | -.0007229 | .7506374 |
| cg10163406 | .0004251 | .1206762 | -.0019981 | .2965611 |
| cg19029445 | -.0000483 | .9258016 | .0024227 | .5037308 |
| cg21051696 | .0000221 | .9452506 | .0018652 | .4057066 |
| cg11360522 | .0010293 | .0369317 | -.0015469 | .6541463 |
| cg13492490 | .0003681 | .3540872 | -.0009017 | .7452315 |
| cg15366573 | -.0001367 | .5906539 | .0021946 | .2159186 |
| cg24296397 | .0005068 | .1803276 | .000361 | .8914322 |
| cg06408559 | .0001418 | .7373557 | .0009182 | .7558973 |
| cg21086113 | .0001879 | .6723865 | -.0022052 | .4773762 |
| cg23541926 | .0009239 | .1486182 | -.0032003 | .4741275 |
| cg23652484 | .0001247 | .7325607 | -.0020435 | .4227015 |
| cg01408926 | -.000079 | .7386471 | -.0005354 | .7460838 |
| cg23478124 | .0000681 | .8487694 | -.0019266 | .4394158 |
| cg13245626 | .0014693 | .0210153 | -.0026568 | .5512381 |
| cg10411339 | -.0000311 | .922792 | -.0054796 | .0141346 |
| cg15617775 | .0001912 | .4676901 | -.001943 | .2905005 |
| cg22681074 | .0001774 | .5000517 | .00112 | .5420291 |
| cg19136673 | .0002409 | .4140962 | -.0002334 | .9098414 |
| cg15937829 | -.0002123 | .5248097 | -.0038195 | .1010176 |
| cg11476102 | -.0002133 | .4631405 | .0012843 | .5270671 |
| cg14292572 | .0001618 | .6015143 | -.0003242 | .8809267 |
| cg12819393 | -.0006879 | .0649177 | -.0082827 | .0014066 |
| cg01961682 | .0003331 | .1443237 | .0013708 | .3899815 |
| cg20228124 | -.0000875 | .8022193 | .0004776 | .8447449 |
| cg21262198 | .0007383 | .2967231 | -.0031806 | .5199406 |
| cg01098955 | .0004038 | .3591054 | .0023402 | .4467746 |
| cg01130991 | -.0010626 | .0105616 | -.0002372 | .9350793 |
| cg18347497 | .0008321 | .0926755 | .0004575 | .894857 |
| cg18750087 | -.0000245 | .9492304 | -.0004889 | .8554607 |
| cg02983090 | .0000907 | .8411574 | -.0039797 | .2076454 |
| cg07302471 | .0000894 | .90939 | .0024745 | .6518051 |
| cg16725984 | .0002255 | .7937595 | -.0081126 | .1776841 |
| cg19764841 | .0002665 | .2464545 | -.0019073 | .2350217 |
| cg01893462 | .000086 | .7746215 | .0025316 | .2269808 |
| cg19571256 | .0001037 | .7115174 | -.0010255 | .6003808 |
| cg24006547 | -.0006023 | .0867061 | -.0031494 | .1999899 |
| cg19426434 | .0001195 | .6815784 | .000711 | .7267752 |
| cg08241011 | .0001382 | .6522962 | -.0007287 | .7338154 |
| cg14774445 | .0000784 | .8166143 | .0003986 | .8659228 |
| cg09347218 | .0002739 | .4933488 | -.0018596 | .5054274 |
| cg03972892 | .000479 | .0946591 | -.0009793 | .6251301 |
| cg05704547 | .0002197 | .4020609 | -.003785 | .0383695 |
| cg00464492 | -.0003812 | .2051377 | -.0016616 | .429267 |
| cg23417486 | .0004328 | .441947 | -.0009569 | .8077285 |
| cg08726900 | .0003636 | .4321466 | -.001249 | .6992829 |
| cg22787724 | .0003409 | .4925801 | .0015802 | .6488271 |
| cg18079500 | -.0001772 | .5651593 | .0001704 | .9368926 |
| cg16581631 | -.0000326 | .8311067 | .000331 | .7561936 |
| cg11993583 | .0001322 | .5900311 | -.0011139 | .5157458 |
| cg23238168 | -.0001331 | .6997493 | -.0012236 | .611783 |
| cg04350530 | -.0000201 | .9582696 | -.000701 | .7940179 |
| cg11387576 | .0001546 | .6185246 | -.0020746 | .3385498 |
| cg09626867 | .0007891 | .1412597 | .0061493 | .1006403 |
| cg01704198 | .0000735 | .7917175 | .0010441 | .5911992 |
| cg21757973 | .0007337 | .1615197 | -.0058946 | .1071746 |
| cg11932158 | .0010318 | .1602449 | -.0006239 | .9033346 |
| cg07952905 | .0003237 | .2326866 | .0007412 | .6958146 |
| cg08043301 | -.0001911 | .5500511 | -.0012426 | .5778785 |
| cg24824128 | .0003003 | .6004262 | -.0018129 | .6507061 |
| cg07454365 | .0003917 | .2590028 | .0025064 | .3011388 |
| cg11199014 | -.0005933 | .1677447 | .0012579 | .6756881 |
| cg09178900 | .0001191 | .508412 | .0003295 | .793451 |
| cg09199323 | -.0001384 | .7319086 | -.0043645 | .1214697 |
| cg13584078 | .0002357 | .2027053 | .0016284 | .2075907 |
| cg04999352 | .0001005 | .7773522 | -.0027541 | .2667595 |
| cg24769355 | .0001843 | .6619425 | .0006223 | .8325676 |
| cg25585400 | .0000472 | .8400017 | -.0017373 | .2873397 |
| cg14499274 | -.0006887 | .0754456 | .0000345 | .9898462 |
| cg23009865 | .0024617 | .0597414 | .0013704 | .8809294 |
| cg12855906 | .0001033 | .8131955 | .0008582 | .7785394 |
| cg13668657 | .0004413 | .0957282 | -.0004951 | .7893191 |
| cg16790511 | .0001391 | .7969512 | -.0022226 | .5561653 |
| cg18210365 | -.0004452 | .1539162 | .000402 | .8539118 |
| cg06478995 | .0005432 | .2414339 | .0011893 | .7136542 |
| cg12908125 | -.0005111 | .1746409 | .0039488 | .1330823 |
| cg21936292 | .000527 | .2699209 | -.0015799 | .6360016 |
| cg24951593 | .000199 | .4469744 | .0003973 | .8279243 |
| cg08943494 | .0009087 | .3016733 | -.0000905 | .9882577 |
| cg00980870 | -.0003347 | .4734042 | .0019362 | .5526719 |
| cg25638549 | -.0002332 | .7019576 | .0015713 | .7120379 |
| cg20068209 | .0002604 | .5518104 | -.0040406 | .1858591 |
| cg08307171 | .0001337 | .68217 | -.0003445 | .8799496 |
| cg08531140 | .0000378 | .9156678 | .0017383 | .4850076 |
| cg04521626 | .0003581 | .4008615 | -.0006086 | .8380805 |
| cg14184306 | .0002671 | .5680249 | -.0030079 | .3571693 |
| cg17984201 | .0015178 | .0044287 | -.0022973 | .5390184 |
| cg25592832 | .0003071 | .1389584 | .0002286 | .8748508 |
| cg20207982 | -.0000298 | .9517602 | -.0020646 | .548737 |
| cg15016701 | .0000757 | .8471264 | -.001804 | .5106232 |
| cg15236764 | .0001477 | .6370014 | -.0012367 | .5716739 |
| cg13121392 | .0002517 | .4410215 | -.0009759 | .6689052 |
| cg02493846 | .0007121 | .0378442 | -.0010675 | .6564997 |
| cg03186149 | .0001438 | .6595706 | -.0019151 | .4006741 |
| cg22680451 | .0000426 | .8323424 | -.0007736 | .5823253 |
| cg25772839 | .0001318 | .776706 | .000142 | .9650916 |
| cg05328218 | .001275 | .0262503 | .0021613 | .5904995 |
| cg10819495 | .0002572 | .351231 | -.0017196 | .37216 |
| cg01803294 | -.0001503 | .6118794 | .0008868 | .668184 |
| cg24442506 | .0006116 | .1887153 | .0004088 | .899982 |
| cg19748455 | .000271 | .4651262 | .0003248 | .9002609 |
| cg24503146 | .0001192 | .7767181 | .0021673 | .4600787 |
| cg06356306 | -.000012 | .969434 | -.0012187 | .5767139 |
| cg19790908 | -.0004528 | .0808112 | -.0003851 | .8318848 |
| cg05650559 | .0005665 | .0449814 | .0036181 | .0668288 |
| cg13741394 | -.0003029 | .2537659 | -.0009986 | .5903323 |
| cg03814573 | -.0002916 | .2975782 | -.0040714 | .0370183 |
| cg10728351 | .0002772 | .5679289 | -.0026239 | .4388978 |
| cg14186145 | .000415 | .4797421 | .0000672 | .9869359 |
| cg18765405 | -.0002065 | .33652 | .0008923 | .5521996 |
| cg18088971 | .0000807 | .7570859 | -.0017156 | .3464632 |
| cg07319811 | .0003677 | .3349102 | -.0015786 | .553524 |
| cg02550660 | -.0000615 | .8707666 | -.0000987 | .9701838 |
| cg14090154 | -.0001313 | .6474678 | .0001509 | .9400399 |
| cg07338715 | .0002607 | .4249787 | -.0008845 | .6984577 |
| cg01798157 | -.0001807 | .6781841 | .0021613 | .4773346 |
| cg10921592 | .0001863 | .693487 | -.0021105 | .5226254 |
| cg04621850 | .0007768 | .0413135 | -.0024067 | .3662667 |
| cg17837526 | .0002019 | .4659946 | -.0007552 | .6963048 |
| cg22451300 | .0003418 | .438723 | .0000585 | .9848773 |
| cg14620184 | -.0000694 | .8240038 | -.0002405 | .9121239 |
| cg17344060 | -.0003032 | .4829193 | .0010908 | .7178465 |
| cg04878826 | .0002935 | .3266028 | .0000365 | .9860666 |
| cg17361314 | -.0000269 | .9249357 | -.0033418 | .0934286 |
| cg10213935 | .0000143 | .9782344 | -.0030274 | .4070747 |
| cg21760140 | -.0001754 | .6684152 | -.0005429 | .8494487 |
| cg25538809 | -.0000539 | .8123837 | .0004807 | .7618104 |
| cg11212234 | .0001097 | .786272 | -.0013657 | .6289309 |
| cg24750887 | .0001941 | .3476034 | -.0019884 | .1680017 |
| cg17950169 | .0002868 | .3193297 | -.0006758 | .7369884 |
| cg12533384 | .0008391 | .1147359 | -.0023287 | .5312988 |
| cg27246321 | -.000947 | .0227681 | -.0032063 | .2706228 |
| cg09492210 | .0001709 | .4872133 | -.0022102 | .1979049 |
| cg11731280 | .0007208 | .1016653 | -.0015533 | .6140001 |
| cg11343553 | -.0001917 | .5774679 | -.0013977 | .5608075 |
| cg02017450 | .0009439 | .198113 | -.0033463 | .5138433 |
| cg27184903 | -.0005209 | .1388815 | -.0029658 | .2278157 |
| cg25535569 | -.000426 | .2611487 | -.0035357 | .1816297 |
| cg16536918 | .0003681 | .3967807 | .0020804 | .4929346 |
| cg11831006 | .000364 | .2551085 | -.0025358 | .256297 |
| cg10415685 | -.000148 | .7095952 | -.0023031 | .4065273 |
| cg05901971 | .0006131 | .1038488 | .0000681 | .9793831 |
| cg05669550 | -.0007208 | .1364387 | -.0034236 | .311512 |
| cg15475323 | .0001832 | .5151994 | -.0005187 | .7919799 |
| cg22329411 | -.0000272 | .9346866 | -.0035261 | .127897 |
| cg12420118 | -.0005299 | .1042453 | -.0014572 | .5228801 |
| cg13608623 | .0009135 | .060251 | -.0038538 | .2569318 |
| cg18982976 | .0005991 | .2489876 | .0014067 | .6985305 |
| cg10676600 | -.000591 | .0474002 | -.0013462 | .518609 |
| cg11036672 | -.0003 | .34959 | .0009599 | .6683499 |
| cg00896287 | .0000361 | .8857132 | -.0017782 | .3106225 |
| cg04033301 | .0003205 | .3532617 | .001279 | .5959959 |
| cg19411100 | .0001758 | .6468136 | -.0001436 | .9572663 |
| cg15737760 | .0006806 | .0794346 | .0015057 | .5790435 |
| cg04083553 | .0001638 | .539593 | -.0004571 | .8064117 |
| cg04354433 | .0000253 | .954698 | -.0016058 | .6049793 |
| cg17747781 | .0012131 | .017813 | -.004216 | .2393972 |
| cg01346147 | .0001812 | .5249832 | -.002832 | .1545128 |
| cg14219918 | -.0003124 | .697228 | -.0031248 | .5773659 |
| cg01167556 | -.0001212 | .6923702 | .0013877 | .516694 |
| cg18897025 | .0004756 | .3705601 | -.0002535 | .9455441 |
| cg06396119 | -.00092 | .0393501 | -.0029441 | .3459595 |
| cg26732196 | .0001556 | .52746 | -.0006374 | .710976 |
| cg03760309 | -.0000813 | .798157 | -.0042875 | .052905 |
| cg01305625 | -.0004236 | .1029077 | -.0026552 | .1434173 |
| cg14368221 | .0004877 | .2015695 | -.0012749 | .6329092 |
| cg17632356 | .0006102 | .2081919 | -.0010333 | .7604195 |
| cg19531057 | .0003605 | .2683294 | -.0010985 | .6292791 |
| cg13611686 | .0004054 | .1736071 | .0009415 | .651181 |
| cg13530937 | .0003532 | .3964871 | -.00048 | .8690088 |
| cg02306236 | .0008382 | .1135508 | .0063776 | .0846544 |
| cg09709426 | .0004659 | .1934814 | -.0013089 | .6012 |
| cg12264462 | .0002666 | .2465504 | .0020404 | .2040699 |
| cg05901196 | -.0001974 | .5774587 | -.0004571 | .8535074 |
| cg03387494 | .0002963 | .4188861 | -.0013925 | .5865419 |
| cg21705355 | .0000713 | .7724256 | -.0010886 | .5269778 |
| cg27239408 | .0000621 | .8311662 | -.0016709 | .4112925 |
| cg08716255 | -.0002973 | .5865464 | -.0048862 | .2002909 |
| cg16534142 | .000039 | .9198633 | -.0020394 | .451708 |
| cg21113478 | .0001812 | .5795518 | .0029099 | .2024172 |
| cg01142407 | 4.04e-06 | .9899283 | -.0025088 | .2617082 |
| cg09479286 | .0000153 | .9759099 | .0031693 | .3716876 |
| cg00050505 | -.0003674 | .4773856 | -.0028027 | .4377061 |
| cg03036214 | .0003703 | .2426622 | -.0013456 | .5434722 |
| cg23108535 | .0002533 | .6222112 | -.0011269 | .7536817 |
| cg16964791 | .0001364 | .6039283 | -.0005856 | .7498069 |
| cg23821206 | .0004433 | .1335473 | .0023837 | .2483178 |
| cg20417154 | .0000195 | .9581215 | -.0000748 | .9769977 |
| cg17348495 | -.0001799 | .6104146 | -.0009344 | .7048498 |
| cg18317026 | .000273 | .4367309 | .0005807 | .812833 |
| cg15940703 | 8.59e-06 | .9820781 | .0011271 | .6729631 |
| cg00685116 | .0000353 | .9041494 | -.0030659 | .1333291 |
| cg00636922 | .0009162 | .0208884 | .0011186 | .6871523 |
| cg02988288 | .0014313 | .0322934 | .0140514 | .0025597 |
| cg03422256 | .0007308 | .0365846 | .0006262 | .7980374 |
| cg17930873 | -.0000857 | .8083906 | .0023627 | .3380432 |
| cg19115490 | -.0001078 | .6995546 | -.0054129 | .0053605 |
| cg05077231 | -.0005765 | .1456368 | .0002419 | .9304057 |
| cg02430430 | .0002429 | .4970475 | -.0025449 | .308256 |
| cg01088608 | -.0004218 | .2443373 | -.0055222 | .0288139 |
| cg07495470 | .0000931 | .7000861 | -.0014853 | .3789677 |
| cg00237080 | .0003376 | .4604391 | -.0018913 | .5539038 |
| cg15397817 | .0001886 | .4209954 | -.0012764 | .43543 |
| cg21131729 | -.0004227 | .2213407 | -.004754 | .0486592 |
| cg27198696 | -.0001171 | .6949773 | -.001148 | .5818841 |
| cg10575219 | .0002095 | .5958074 | -.0012573 | .6485745 |
| cg12503394 | .0001516 | .7136264 | -.0024534 | .3948444 |
| cg12226023 | .0000438 | .9136856 | -.0033916 | .2292196 |
| cg19774236 | -.0002886 | .3036419 | .0016186 | .4089554 |
| cg20196277 | .0007941 | .0694499 | -.0001293 | .9662957 |
| cg01309328 | .0003737 | .2949449 | -.006021 | .0154385 |
| cg14943355 | -.0004838 | .1835326 | .0001197 | .9624555 |
| cg14847379 | -.0000177 | .9216442 | -.0013495 | .2823115 |
| cg03514139 | .0003242 | .3414625 | .0027554 | .2469591 |
| cg05160449 | .0003306 | .4295979 | -.0024946 | .3934618 |
| cg04685228 | .0004339 | .3724243 | -.0030185 | .3743713 |
| cg04668163 | .0002515 | .3654719 | -.0001533 | .9370681 |
| cg23575527 | .0001813 | .5707329 | -.0013652 | .5409891 |
| cg14973857 | .0003971 | .1894882 | -.0010307 | .6261207 |
| cg22699285 | .0000138 | .9673394 | -.0013321 | .5705622 |
| cg11087049 | .0001158 | .580504 | -.0012127 | .4073971 |
| cg08919659 | -.0000584 | .8412703 | -.0028155 | .166189 |
| cg03064693 | .0000154 | .934107 | -.0021165 | .1035772 |
| cg12103569 | .0003111 | .3992986 | .0003849 | .8813766 |
| cg20334115 | .0004876 | .5006261 | -.0045289 | .3703712 |
